# Supplementary material for: Temperature dependent structural, vibrational and magnetic properties of K3Gd5(PO4)6
Source: Royal Society of Chemistry journal article supplement (doi:10.1039/c6cp08086c), 2017-01-01
Supplement: c6cp08086c3.xlsx [file c6cp08086c3.xlsx]

## Sheet: BL
Temp (K)	20			40			60			80			100			120			140			160			180			200			220			240			260			280			300			294			373
	Bonds	Bond Lengths (Å)		Bonds	Bond Lengths (Å)		Bonds	Bond Lengths (Å)		Bonds	Bond Lengths (Å)		Bonds	Bond Lengths (Å)		Bonds	Bond Lengths (Å)		Bonds	Bond Lengths (Å)		Bonds	Bond Lengths (Å)		Bonds	Bond Lengths (Å)		Bonds	Bond Lengths (Å)		Bonds	Bond Lengths (Å)		Bonds	Bond Lengths (Å)		Bonds	Bond Lengths (Å)		Bonds	Bond Lengths (Å)		Bonds	Bond Lengths (Å)		Bonds	Bond Lengths (Å)		Bonds
	Gd1-O2	2.5198(62)		Gd1-O2	2.5193(62)		Gd1-O2	2.5167(63)		Gd1-O2	2.5169(63)		Gd1-O2	2.5162(64)		Gd1-O2	2.5183(63)		Gd1-O2	2.5197(63)		Gd1-O2	2.5231(63)		Gd1-O2	2.5229(62)		Gd1-O2	2.5263(62)		Gd1-O2	2.5256(62)		Gd1-O2	2.5244(62)		Gd1-O2	2.5228(62)		Gd1-O2	2.5267(74)		Gd1-O2	2.5263(75)		Gd1-O2	2.5246(63)		Gd1-O2
	Gd1-O2	2.5198(62)		Gd1-O2	2.5193(62)		Gd1-O2	2.5167(63)		Gd1-O2	2.5169(63)		Gd1-O2	2.5162(64)		Gd1-O2	2.5183(63)		Gd1-O2	2.5197(63)		Gd1-O2	2.5231(63)		Gd1-O2	2.5229(62)		Gd1-O2	2.5263(62)		Gd1-O2	2.5256(62)		Gd1-O2	2.5244(62)		Gd1-O2	2.5228(62)		Gd1-O2	2.5267(74)		Gd1-O2	2.5263(75)		Gd1-O2	2.5246(63)		Gd1-O2
	Gd1-O7	2.5703(59)		Gd1-O7	2.5689(59)		Gd1-O7	2.5786(60)		Gd1-O7	2.5773(60)		Gd1-O7	2.5778(60)		Gd1-O7	2.5761(60)		Gd1-O7	2.5766(60)		Gd1-O7	2.5775(60)		Gd1-O7	2.5774(59)		Gd1-O7	2.5752(59)		Gd1-O7	2.5747(59)		Gd1-O7	2.5763(59)		Gd1-O7	2.5775(59)		Gd1-O7	2.5764(74)		Gd1-O7	2.5701(74)		Gd1-O7	2.5885(60)		Gd1-O7
	Gd1-O7	2.5703(59)		Gd1-O7	2.5689(59)		Gd1-O7	2.5786(60)		Gd1-O7	2.5773(60)		Gd1-O7	2.5778(60)		Gd1-O7	2.5761(60)		Gd1-O7	2.5766(60)		Gd1-O7	2.5775(60)		Gd1-O7	2.5774(59)		Gd1-O7	2.5752(59)		Gd1-O7	2.5747(59)		Gd1-O7	2.5763(59)		Gd1-O7	2.5775(59)		Gd1-O7	2.5764(74)		Gd1-O7	2.5701(74)		Gd1-O7	2.5885(60)		Gd1-O7
	Gd1-O11	2.3176(54)		Gd1-O11	2.3180(54)		Gd1-O11	2.3269(58)		Gd1-O11	2.3210(57)		Gd1-O11	2.3280(58)		Gd1-O11	2.3213(58)		Gd1-O11	2.3232(57)		Gd1-O11	2.3237(58)		Gd1-O11	2.3259(57)		Gd1-O11	2.3264(54)		Gd1-O11	2.3250(54)		Gd1-O11	2.3283(54)		Gd1-O11	2.3269(54)		Gd1-O11	2.3245(59)		Gd1-O11	2.3311(59)		Gd1-O11	2.3351(57)		Gd1-O11
	Gd1-O11	2.3176(54)		Gd1-O11	2.3180(54)		Gd1-O11	2.3269(58)		Gd1-O11	2.3210(57)		Gd1-O11	2.3280(58)		Gd1-O11	2.3213(58)		Gd1-O11	2.3232(57)		Gd1-O11	2.3237(58)		Gd1-O11	2.3259(57)		Gd1-O11	2.3264(54)		Gd1-O11	2.3250(54)		Gd1-O11	2.3283(54)		Gd1-O11	2.3269(54)		Gd1-O11	2.3245(59)		Gd1-O11	2.3311(59)		Gd1-O11	2.3351(57)		Gd1-O11
	Gd1-O12	2.2342(53)		Gd1-O12	2.2346(53)		Gd1-O12	2.2382(59)		Gd1-O12	2.2360(59)		Gd1-O12	2.2384(62)		Gd1-O12	2.2357(59)		Gd1-O12	2.2373(59)		Gd1-O12	2.2417(59)		Gd1-O12	2.2397(53)		Gd1-O12	2.2429(53)		Gd1-O12	2.2419(53)		Gd1-O12	2.2463(53)		Gd1-O12	2.2453(53)		Gd1-O12	2.2430(66)		Gd1-O12	2.2454(66)		Gd1-O12	2.2487(59)		Gd1-O12
	Gd1-O12	2.2342(53)		Gd1-O12	2.2346(53)		Gd1-O12	2.2382(59)		Gd1-O12	2.2360(59)		Gd1-O12	2.2384(62)		Gd1-O12	2.2357(59)		Gd1-O12	2.2373(59)		Gd1-O12	2.2417(59)		Gd1-O12	2.2397(53)		Gd1-O12	2.2429(53)		Gd1-O12	2.2419(53)		Gd1-O12	2.2463(53)		Gd1-O12	2.2453(53)		Gd1-O12	2.2430(66)		Gd1-O12	2.2454(66)		Gd1-O12	2.2487(59)		Gd1-O12
Cood. Number		8			8			8			8			8			8			8			8			8			8			8			8			8			8			8			8
Average Bond Lengths		2.4105(20)			2.4102(20)			2.4151(21)			2.4128(21)			2.4151(22)			2.4128(21)			2.4142(21)			2.4165(21)			2.4165(20)			2.4177(20)			2.4168(20)			2.4188(20)			2.4181(20)			2.4176(24)			2.4182(24)			2.4242(21)
distt × 104		33.209			32.886			32.621			33.325			32.349			33.294			33.062			32.725			32.827			32.29			32.439			31.583			31.883			32.623			30.87			32.253
	Gd2-O3	2.3914(75)		Gd2-O3	2.3904(76)		Gd2-O3	2.3971(131)		Gd2-O3	2.3969(108)		Gd2-O3	2.3907(137)		Gd2-O3	2.3914(106)		Gd2-O3	2.3882(105)		Gd2-O3	2.3882(80)		Gd2-O3	2.3934(80)		Gd2-O3	2.3865(76)		Gd2-O3	2.3856(72)		Gd2-O3	2.3857(72)		Gd2-O3	2.3828(74)		Gd2-O3	2.3893(84)		Gd2-O3	2.3799(85)		Gd2-O3	2.3886(108)		Gd2-O3
	Gd2-O4	2.4379(52)		Gd2-O4	2.4356(52)		Gd2-O4	2.4350(54)		Gd2-O4	2.4337(54)		Gd2-O4	2.4426(53)		Gd2-O4	2.4385(54)		Gd2-O4	2.4369(54)		Gd2-O4	2.4360(52)		Gd2-O4	2.4407(52)		Gd2-O4	2.4412(52)		Gd2-O4	2.4434(52)		Gd2-O4	2.4465(51)		Gd2-O4	2.4484(52)		Gd2-O4	2.4448(65)		Gd2-O4	2.4513(65)		Gd2-O4	2.4534(54)		Gd2-O4
	Gd2-O5	2.3953(67)		Gd2-O5	2.3952(67)		Gd2-O5	2.4019(70)		Gd2-O5	2.4007(70)		Gd2-O5	2.4003(70)		Gd2-O5	2.4000(69)		Gd2-O5	2.3970(69)		Gd2-O5	2.3958(68)		Gd2-O5	2.4006(68)		Gd2-O5	2.3944(67)		Gd2-O5	2.3980(67)		Gd2-O5	2.3962(67)		Gd2-O5	2.3974(67)		Gd2-O5	2.4007(82)		Gd2-O5	2.4021(82)		Gd2-O5	2.4010(70)		Gd2-O5
	Gd2-O5	2.5447(61)		Gd2-O5	2.5439(61)		Gd2-O5	2.5520(66)		Gd2-O5	2.5497(66)		Gd2-O5	2.5484(66)		Gd2-O5	2.5480(66)		Gd2-O5	2.5430(66)		Gd2-O5	2.5477(62)		Gd2-O5	2.5499(61)		Gd2-O5	2.5456(61)		Gd2-O5	2.5470(61)		Gd2-O5	2.5460(61)		Gd2-O5	2.5456(61)		Gd2-O5	2.5448(73)		Gd2-O5	2.5443(73)		Gd2-O5	2.5492(66)		Gd2-O5
	Gd2-O6	2.5183(62)		Gd2-O6	2.5172(62)		Gd2-O6	2.5200(64)		Gd2-O6	2.5191(64)		Gd2-O6	2.5183(65)		Gd2-O6	2.5185(64)		Gd2-O6	2.5171(63)		Gd2-O6	2.5172(63)		Gd2-O6	2.5209(63)		Gd2-O6	2.5175(62)		Gd2-O6	2.5176(62)		Gd2-O6	2.5189(62)		Gd2-O6	2.5194(62)		Gd2-O6	2.5267(80)		Gd2-O6	2.5205(80)		Gd2-O6	2.5280(65)		Gd2-O6
	Gd2-O7	2.4141(45)		Gd2-O7	2.4109(45)		Gd2-O7	2.4169(47)		Gd2-O7	2.4143(46)		Gd2-O7	2.4182(47)		Gd2-O7	2.4146(46)		Gd2-O7	2.4144(46)		Gd2-O7	2.4168(46)		Gd2-O7	2.4169(45)		Gd2-O7	2.4182(45)		Gd2-O7	2.4191(45)		Gd2-O7	2.4246(45)		Gd2-O7	2.4245(45)		Gd2-O7	2.4135(49)		Gd2-O7	2.4236(49)		Gd2-O7	2.4367(47)		Gd2-O7
	Gd2-O8	2.3379(45)		Gd2-O8	2.3387(45)		Gd2-O8	2.3349(48)		Gd2-O8	2.3351(48)		Gd2-O8	2.3381(49)		Gd2-O8	2.3373(48)		Gd2-O8	2.3392(48)		Gd2-O8	2.3388(45)		Gd2-O8	2.3397(45)		Gd2-O8	2.3450(45)		Gd2-O8	2.3469(45)		Gd2-O8	2.3460(44)		Gd2-O8	2.3490(45)		Gd2-O8	2.3341(52)		Gd2-O8	2.3495(52)		Gd2-O8	2.3479(48)		Gd2-O8
	Gd2-O9	2.3799(78)		Gd2-O9	2.3787(78)		Gd2-O9	2.3775(81)		Gd2-O9	2.3775(80)		Gd2-O9	2.3804(81)		Gd2-O9	2.3778(80)		Gd2-O9	2.3792(80)		Gd2-O9	2.3772(79)		Gd2-O9	2.3794(79)		Gd2-O9	2.3787(78)		Gd2-O9	2.3816(78)		Gd2-O9	2.3810(78)		Gd2-O9	2.3848(78)		Gd2-O9	2.3790(93)		Gd2-O9	2.3838(93)		Gd2-O9	2.3880(81)		Gd2-O9
	Gd2-O11	2.6098(59)		Gd2-O11	2.6064(59)		Gd2-O11	2.6093(62)		Gd2-O11	2.6076(62)		Gd2-O11	2.6112(62)		Gd2-O11	2.6069(61)		Gd2-O11	2.6079(61)		Gd2-O11	2.6071(60)		Gd2-O11	2.6110(60)		Gd2-O11	2.6079(59)		Gd2-O11	2.6105(59)		Gd2-O11	2.6109(59)		Gd2-O11	2.6146(59)		Gd2-O11	2.6085(77)		Gd2-O11	2.6122(77)		Gd2-O11	2.6220(62)		Gd2-O11
Cood. Number		9			9			9			9			9			9			9			9			9			9			9			9			9			9			9			9
Average Bond Lengths		2.4477(21)			2.4464(21)			2.4494(24)			2.4483(23)			2.4498(25)			2.4481(23)			2.4470(23)			2.4472(21)			2.4503(21)			2.4483(21)			2.4500(20)			2.4507(20)			2.4518(20)			2.4490(25)			2.4519(25)			2.4572(23)
distt × 104		11.953			11.778			12.157			12.007			11.987			11.887			11.755			11.95			12.014			11.666			11.642			11.675			11.719			12.219			11.552			12.082
	Gd3-O1	2.4062(47)		Gd3-O1	2.4075(47)		Gd3-O1	2.4161(50)		Gd3-O1	2.4147(47)		Gd3-O1	2.4123(50)		Gd3-O1	2.4119(47)		Gd3-O1	2.4112(47)		Gd3-O1	2.4123(47)		Gd3-O1	2.4111(47)		Gd3-O1	2.4110(47)		Gd3-O1	2.4075(47)		Gd3-O1	2.4015(47)		Gd3-O1	2.4019(47)		Gd3-O1	2.4072(59)		Gd3-O1	2.4048(59)		Gd3-O1	2.4024(47)		Gd3-O1
	Gd3-O1	2.4305(73)		Gd3-O1	2.4316(73)		Gd3-O1	2.4395(76)		Gd3-O1	2.4385(75)		Gd3-O1	2.4329(76)		Gd3-O1	2.4328(74)		Gd3-O1	2.4323(74)		Gd3-O1	2.4323(74)		Gd3-O1	2.4318(73)		Gd3-O1	2.4314(73)		Gd3-O1	2.4286(73)		Gd3-O1	2.4269(73)		Gd3-O1	2.4259(73)		Gd3-O1	2.4342(84)		Gd3-O1	2.4289(84)		Gd3-O1	2.4213(75)		Gd3-O1
	Gd3-O2	2.3521(45)		Gd3-O2	2.3531(45)		Gd3-O2	2.3610(48)		Gd3-O2	2.3602(47)		Gd3-O2	2.3514(48)		Gd3-O2	2.3565(47)		Gd3-O2	2.3541(45)		Gd3-O2	2.3595(45)		Gd3-O2	2.3587(45)		Gd3-O2	2.3569(45)		Gd3-O2	2.3505(44)		Gd3-O2	2.3484(44)		Gd3-O2	2.3428(44)		Gd3-O2	2.3486(54)		Gd3-O2	2.3354(54)		Gd3-O2	2.3531(47)		Gd3-O2
	Gd3-O3	2.3554(79)		Gd3-O3	2.3566(79)		Gd3-O3	2.3624(127)		Gd3-O3	2.3598(104)		Gd3-O3	2.3555(129)		Gd3-O3	2.3565(102)		Gd3-O3	2.3572(86)		Gd3-O3	2.3577(81)		Gd3-O3	2.3574(81)		Gd3-O3	2.3548(79)		Gd3-O3	2.3520(62)		Gd3-O3	2.3499(62)		Gd3-O3	2.3503(78)		Gd3-O3	2.3546(97)		Gd3-O3	2.3426(97)		Gd3-O3	2.3527(86)		Gd3-O3
	Gd3-O6	2.3729(47)		Gd3-O6	2.3720(47)		Gd3-O6	2.3851(49)		Gd3-O6	2.3844(48)		Gd3-O6	2.3773(49)		Gd3-O6	2.3798(48)		Gd3-O6	2.3773(48)		Gd3-O6	2.3792(47)		Gd3-O6	2.3807(47)		Gd3-O6	2.3743(47)		Gd3-O6	2.3646(46)		Gd3-O6	2.3614(46)		Gd3-O6	2.3564(46)		Gd3-O6	2.3594(59)		Gd3-O6	2.3472(59)		Gd3-O6	2.3730(48)		Gd3-O6
	Gd3-O10	2.5739(46)		Gd3-O10	2.5740(46)		Gd3-O10	2.5793(49)		Gd3-O10	2.5777(46)		Gd3-O10	2.5774(49)		Gd3-O10	2.5768(46)		Gd3-O10	2.5772(46)		Gd3-O10	2.5794(46)		Gd3-O10	2.5783(46)		Gd3-O10	2.5766(46)		Gd3-O10	2.5737(46)		Gd3-O10	2.5704(46)		Gd3-O10	2.5690(46)		Gd3-O10	2.5709(59)		Gd3-O10	2.5656(59)		Gd3-O10	2.5698(46)		Gd3-O10
	Gd3-O10	2.7451(61)		Gd3-O10	2.7447(61)		Gd3-O10	2.7472(64)		Gd3-O10	2.7483(62)		Gd3-O10	2.7460(64)		Gd3-O10	2.7462(62)		Gd3-O10	2.7477(62)		Gd3-O10	2.7468(61)		Gd3-O10	2.7474(61)		Gd3-O10	2.7475(60)		Gd3-O10	2.7457(60)		Gd3-O10	2.7444(60)		Gd3-O10	2.7432(60)		Gd3-O10	2.7448(79)		Gd3-O10	2.7405(79)		Gd3-O10	2.7419(63)		Gd3-O10
	Gd3-O12	2.5988(64)		Gd3-O12	2.6007(64)		Gd3-O12	2.6033(67)		Gd3-O12	2.6030(66)		Gd3-O12	2.6011(68)		Gd3-O12	2.6013(66)		Gd3-O12	2.6019(65)		Gd3-O12	2.6032(65)		Gd3-O12	2.6034(65)		Gd3-O12	2.6020(64)		Gd3-O12	2.5999(64)		Gd3-O12	2.5978(64)		Gd3-O12	2.5946(64)		Gd3-O12	2.5993(80)		Gd3-O12	2.5923(80)		Gd3-O12	2.5948(67)		Gd3-O12
Cood. Number		8			8			8			8			8			8			8			8			8			8			8			8			8			8			8			8
Average Bond Lengths		2.4794(21)			2.4800(21)			2.4867(25)			2.4858(23)			2.4817(25)			2.4827(23)			2.4824(21)			2.4838(21)			2.4836(21)			2.4818(21)			2.4778(20)			2.4751(20)			2.4730(21)			2.4774(26)			2.4697(26)			2.4761(22)
distt × 104		29.375			29.273			28.065			28.386			29.275			28.86			29.295			28.9			28.975			29.403			30.143			30.416			30.643			30.049			31.276			29.14
	K1-O2	3.0251(62)		K1-O2	3.0293(62)		K1-O2	3.0203(70)		K1-O2	3.0287(70)		K1-O2	3.0273(70)		K1-O2	3.0319(66)		K1-O2	3.0332(62)		K1-O2	3.0338(62)		K1-O2	3.0329(62)		K1-O2	3.0401(62)		K1-O2	3.0423(62)		K1-O2	3.0402(62)		K1-O2	3.0436(62)		K1-O2	3.0424(66)		K1-O2	3.0503(66)		K1-O2	3.0418(67)		K1-O2
	K1-O4	2.5719(130)		K1-O4	2.5715(130)		K1-O4	2.5665(134)		K1-O4	2.5725(134)		K1-O4	2.5755(134)		K1-O4	2.5696(129)		K1-O4	2.5698(130)		K1-O4	2.5710(130)		K1-O4	2.5692(130)		K1-O4	2.5748(124)		K1-O4	2.5795(124)		K1-O4	2.5820(112)		K1-O4	2.5877(124)		K1-O4	2.5855(131)		K1-O4	2.5852(132)		K1-O4	2.5802(136)		K1-O4
	K1-O6	2.8080(69)		K1-O6	2.8081(69)		K1-O6	2.7999(69)		K1-O6	2.8009(69)		K1-O6	2.8064(69)		K1-O6	2.8059(69)		K1-O6	2.8054(69)		K1-O6	2.8008(69)		K1-O6	2.8041(69)		K1-O6	2.8094(69)		K1-O6	2.8101(69)		K1-O6	2.8139(69)		K1-O6	2.8156(69)		K1-O6	2.8168(71)		K1-O6	2.8212(71)		K1-O6	2.8064(69)		K1-O6
	K1-O7	3.2081(69)		K1-O7	3.2111(69)		K1-O7	3.2108(71)		K1-O7	3.2148(71)		K1-O7	3.2189(71)		K1-O7	3.2175(69)		K1-O7	3.2190(69)		K1-O7	3.2200(69)		K1-O7	3.2155(69)		K1-O7	3.2200(69)		K1-O7	3.2212(69)		K1-O7	3.2266(69)		K1-O7	3.2272(69)		K1-O7	3.2341(72)		K1-O7	3.2343(72)		K1-O7	3.2307(71)		K1-O7
	K1-O8	2.9868(81)		K1-O8	2.9885(81)		K1-O8	2.9795(85)		K1-O8	2.9852(85)		K1-O8	2.9988(85)		K1-O8	2.9930(84)		K1-O8	2.9945(84)		K1-O8	2.9883(82)		K1-O8	2.9859(82)		K1-O8	3.0008(82)		K1-O8	3.0054(82)		K1-O8	3.0147(82)		K1-O8	3.0162(82)		K1-O8	3.0132(84)		K1-O8	3.0206(84)		K1-O8	3.0041(85)		K1-O8
	K1-O8	3.0907(73)		K1-O8	3.0925(73)		K1-O8	3.0622(92)		K1-O8	3.0631(91)		K1-O8	3.0696(92)		K1-O8	3.0721(84)		K1-O8	3.0785(84)		K1-O8	3.0763(73)		K1-O8	3.0803(73)		K1-O8	3.0942(73)		K1-O8	3.0988(73)		K1-O8	3.1040(73)		K1-O8	3.1064(73)		K1-O8	3.1005(85)		K1-O8	3.1073(85)		K1-O8	3.0955(92)		K1-O8
	K1-O9	2.9609(70)		K1-O9	2.9589(70)		K1-O9	2.9636(76)		K1-O9	2.9669(76)		K1-O9	2.9664(76)		K1-O9	2.9620(76)		K1-O9	2.9621(76)		K1-O9	2.9630(76)		K1-O9	2.9611(76)		K1-O9	2.9646(70)		K1-O9	2.9622(70)		K1-O9	2.9541(70)		K1-O9	2.9555(70)		K1-O9	2.9505(76)		K1-O9	2.9532(76)		K1-O9	2.9488(77)		K1-O9
	K1-O9	2.6599(61)		K1-O9	2.6588(61)		K1-O9	2.6387(67)		K1-O9	2.6409(66)		K1-O9	2.6591(67)		K1-O9	2.6472(64)		K1-O9	2.6496(64)		K1-O9	2.6500(64)		K1-O9	2.6529(64)		K1-O9	2.6628(62)		K1-O9	2.6765(61)		K1-O9	2.6892(61)		K1-O9	2.6959(61)		K1-O9	2.6870(69)		K1-O9	2.6965(68)		K1-O9	2.6817(66)		K1-O9
	K1-O10	2.4643(54)		K1-O10	2.4717(54)		K1-O10	2.4742(54)		K1-O10	2.4772(54)		K1-O10	2.4787(54)		K1-O10	2.4824(54)		K1-O10	2.4787(54)		K1-O10	2.4745(54)		K1-O10	2.4793(54)		K1-O10	2.4787(54)		K1-O10	2.4711(54)		K1-O10	2.4713(54)		K1-O10	2.4679(54)		K1-O10	2.4844(66)		K1-O10	2.4790(66)		K1-O10	2.4792(54)		K1-O10
Cood. Number		9			9			9			9			9			9			9			9			9			9			9			9			9			9			9			9
Average Bond Lengths		2.8640(26)			2.8656(26)			2.8573(28)			2.8611(27)			2.8668(28)			2.8646(27)			2.8656(27)			2.8642(26)			2.8646(26)			2.8717(25)			2.8741(25)			2.8773(25)			2.8796(25)			2.8794(27)			2.8831(27)			2.8743(28)
distt × 104		69.101			68.896			68.346			68.33			67.666			68.427			69.234			69.512			68.532			69.343			69.493			69.259			69.168			68.02			68.983			68.687
	K2-O7	3.1216(65)		K2-O7	3.1254(65)		K2-O7	3.1200(66)		K2-O7	3.1173(66)		K2-O7	3.1269(68)		K2-O7	3.1208(66)		K2-O7	3.1242(66)		K2-O7	3.1256(65)		K2-O7	3.1231(66)		K2-O7	3.1331(66)		K2-O7	3.1339(66)		K2-O7	3.1365(66)		K2-O7	3.1382(66)		K2-O7	3.1385(75)		K2-O7	3.1453(75)		K2-O7	3.1357(65)		K2-O7
	K2-O7	3.1216(65)		K2-O7	3.1254(65)		K2-O7	3.1200(66)		K2-O7	3.1173(66)		K2-O7	3.1269(68)		K2-O7	3.1208(66)		K2-O7	3.1242(66)		K2-O7	3.1256(65)		K2-O7	3.1231(66)		K2-O7	3.1331(66)		K2-O7	3.1339(66)		K2-O7	3.1365(66)		K2-O7	3.1382(66)		K2-O7	3.1385(75)		K2-O7	3.1453(75)		K2-O7	3.1357(65)		K2-O7
	K2-O8	3.0739(48)		K2-O8	3.0755(48)		K2-O8	3.0487(63)		K2-O8	3.0503(63)		K2-O8	3.0542(63)		K2-O8	3.0606(62)		K2-O8	3.0608(62)		K2-O8	3.0637(48)		K2-O8	3.0712(48)		K2-O8	3.0795(48)		K2-O8	3.0790(48)		K2-O8	3.0781(48)		K2-O8	3.0805(48)		K2-O8	3.0751(62)		K2-O8	3.0848(62)		K2-O8	3.0771(62)		K2-O8
	K2-O8	3.0739(48)		K2-O8	3.0755(48)		K2-O8	3.0487(63)		K2-O8	3.0503(63)		K2-O8	3.0542(63)		K2-O8	3.0606(62)		K2-O8	3.0608(62)		K2-O8	3.0637(48)		K2-O8	3.0712(48)		K2-O8	3.0795(48)		K2-O8	3.0790(48)		K2-O8	3.0781(48)		K2-O8	3.0805(48)		K2-O8	3.0751(62)		K2-O8	3.0848(62)		K2-O8	3.0771(62)		K2-O8
	K2-O11	2.7388(67)		K2-O11	2.7439(67)		K2-O11	2.7335(70)		K2-O11	2.7328(70)		K2-O11	2.7401(72)		K2-O11	2.7358(70)		K2-O11	2.7356(70)		K2-O11	2.7337(70)		K2-O11	2.7368(70)		K2-O11	2.7394(67)		K2-O11	2.7450(66)		K2-O11	2.7474(66)		K2-O11	2.7475(66)		K2-O11	2.7463(71)		K2-O11	2.7511(71)		K2-O11	2.7531(70)		K2-O11
	K2-O11	2.7388(67)		K2-O11	2.7439(67)		K2-O11	2.7335(70)		K2-O11	2.7328(70)		K2-O11	2.7401(72)		K2-O11	2.7358(70)		K2-O11	2.7356(70)		K2-O11	2.7337(70)		K2-O11	2.7368(70)		K2-O11	2.7394(67)		K2-O11	2.7450(66)		K2-O11	2.7474(66)		K2-O11	2.7475(66)		K2-O11	2.7463(71)		K2-O11	2.7511(71)		K2-O11	2.7531(70)		K2-O11
	K2-O12	2.6193(64)		K2-O12	2.6219(64)		K2-O12	2.6158(68)		K2-O12	2.6162(69)		K2-O12	2.6195(72)		K2-O12	2.6162(68)		K2-O12	2.6217(68)		K2-O12	2.6195(68)		K2-O12	2.6193(64)		K2-O12	2.6259(64)		K2-O12	2.6289(64)		K2-O12	2.6334(64)		K2-O12	2.6347(64)		K2-O12	2.6331(75)		K2-O12	2.6345(75)		K2-O12	2.6240(69)		K2-O12
	K2-O12	2.6193(64)		K2-O12	2.6219(64)		K2-O12	2.6158(68)		K2-O12	2.6162(69)		K2-O12	2.6195(72)		K2-O12	2.6162(68)		K2-O12	2.6217(68)		K2-O12	2.6195(68)		K2-O12	2.6193(64)		K2-O12	2.6259(64)		K2-O12	2.6289(64)		K2-O12	2.6334(64)		K2-O12	2.6347(64)		K2-O12	2.6331(75)		K2-O12	2.6345(75)		K2-O12	2.6240(69)		K2-O12
Cood. Number		8			8			8			8			8			8			8			8			8			8			8			8			8			8			8			8
Average Bond Lengths		2.8884(22)			2.8916(22)			2.8795(24)			2.8792(24)			2.8852(24)			2.8834(24)			2.8856(24)			2.8856(22)			2.8876(22)			2.8945(22)			2.8967(22)			2.8989(22)			2.9002(22)			2.8982(25)			2.9039(25)			2.8975(24)
distt × 104		55.01			54.717			53.463			53.245			53.636			54.394			53.967			54.997			55.129			55.908			54.89			54.141			54.388			54.28			55.417			54.986
	P1-O3	1.6217(68)		P1-O3	1.6218(68)		P1-O3	1.6268(113)		P1-O3	1.6254(107)		P1-O3	1.6196(126)		P1-O3	1.6213(93)		P1-O3	1.6205(92)		P1-O3	1.6244(90)		P1-O3	1.6231(82)		P1-O3	1.6242(68)		P1-O3	1.6222(66)		P1-O3	1.6196(66)		P1-O3	1.6168(68)		P1-O3	1.6201(83)		P1-O3	1.6165(83)		P1-O3	1.6134(92)		P1-O3
	P1-O4	1.5086(108)		P1-O4	1.5069(108)		P1-O4	1.5096(112)		P1-O4	1.5093(108)		P1-O4	1.5118(112)		P1-O4	1.5104(109)		P1-O4	1.5111(109)		P1-O4	1.5108(109)		P1-O4	1.5097(108)		P1-O4	1.5112(105)		P1-O4	1.5111(105)		P1-O4	1.5101(96)		P1-O4	1.5143(105)		P1-O4	1.5132(111)		P1-O4	1.5167(112)		P1-O4	1.5144(109)		P1-O4
	P1-O8	1.5656(68)		P1-O8	1.5691(68)		P1-O8	1.5647(74)		P1-O8	1.5671(73)		P1-O8	1.5678(75)		P1-O8	1.5686(73)		P1-O8	1.5699(73)		P1-O8	1.5682(71)		P1-O8	1.5687(68)		P1-O8	1.5712(68)		P1-O8	1.5745(68)		P1-O8	1.5723(68)		P1-O8	1.5749(68)		P1-O8	1.5715(74)		P1-O8	1.5767(74)		P1-O8	1.5724(73)		P1-O8
	P1-O12	1.5299(57)		P1-O12	1.5318(57)		P1-O12	1.5340(66)		P1-O12	1.5318(57)		P1-O12	1.5351(66)		P1-O12	1.5336(57)		P1-O12	1.5338(57)		P1-O12	1.5332(57)		P1-O12	1.5346(57)		P1-O12	1.5331(57)		P1-O12	1.5345(57)		P1-O12	1.5360(56)		P1-O12	1.5367(56)		P1-O12	1.5358(58)		P1-O12	1.5381(57)		P1-O12	1.5428(57)		P1-O12
Cood. Number		4			4			4			4			4			4			4			4			4			4			4			4			4			4			4			4
Average Bond Lengths		1.5564(39)			1.5574(39)			1.5588(47)			1.5584(45)			1.5586(49)			1.5585(43)			1.5588(43)			1.5591(42)			1.5590(40)			1.5599(38)			1.5606(38)			1.5595(37)			1.5607(38)			1.5602(42)			1.5620(42)			1.5607(43)
distt × 104		7.57			7.718			7.921			7.911			6.736			7.186			7.03			7.563			7.435			7.557			7.308			6.96			6.229			6.694			5.954			5.518
	P2-O1	1.5628(65)		P2-O1	1.5642(65)		P2-O1	1.5734(68)		P2-O1	1.5720(68)		P2-O1	1.5723(68)		P2-O1	1.5706(68)		P2-O1	1.5714(68)		P2-O1	1.5729(68)		P2-O1	1.5697(65)		P2-O1	1.5711(65)		P2-O1	1.5667(65)		P2-O1	1.5624(65)		P2-O1	1.5631(65)		P2-O1	1.5684(78)		P2-O1	1.5647(78)		P2-O1	1.5665(73)		P2-O1
	P2-O5	1.5515(61)		P2-O5	1.5510(61)		P2-O5	1.5583(62)		P2-O5	1.5582(62)		P2-O5	1.5566(62)		P2-O5	1.5562(62)		P2-O5	1.5560(62)		P2-O5	1.5539(61)		P2-O5	1.5568(61)		P2-O5	1.5531(61)		P2-O5	1.5537(61)		P2-O5	1.5529(61)		P2-O5	1.5528(61)		P2-O5	1.5538(62)		P2-O5	1.5562(62)		P2-O5	1.5537(72)		P2-O5
	P2-O10	1.5437(63)		P2-O10	1.5462(63)		P2-O10	1.5525(72)		P2-O10	1.5502(71)		P2-O10	1.5505(71)		P2-O10	1.5511(71)		P2-O10	1.5503(71)		P2-O10	1.5486(71)		P2-O10	1.5503(69)		P2-O10	1.5467(63)		P2-O10	1.5447(63)		P2-O10	1.5439(63)		P2-O10	1.5416(63)		P2-O10	1.5484(77)		P2-O10	1.5453(81)		P2-O10	1.5434(71)		P2-O10
	P2-O11	1.6173(67)		P2-O11	1.6175(67)		P2-O11	1.6209(77)		P2-O11	1.6155(77)		P2-O11	1.6166(77)		P2-O11	1.6142(78)		P2-O11	1.6159(77)		P2-O11	1.6174(77)		P2-O11	1.6197(77)		P2-O11	1.6182(67)		P2-O11	1.6185(67)		P2-O11	1.6174(67)		P2-O11	1.6159(67)		P2-O11	1.6188(69)		P2-O11	1.6199(79)		P2-O11	1.6123(79)		P2-O11
Cood. Number		4			4			4			4			4			4			4			4			4			4			4			4			4			4			4			4
Average Bond Lengths		1.5688(32)			1.5697(32)			1.5763(35)			1.5740(35)			1.5740(35)			1.5730(35)			1.5734(35)			1.5732(35)			1.5741(34)			1.5722(32)			1.5709(32)			1.5691(32)			1.5683(32)			1.5724(36)			1.5715(38)			1.5690(37)
distt × 104		3.37			3.271			2.902			2.568			2.696			2.487			2.673			2.959			2.988			3.166			3.306			3.324			3.296			3.126			3.349			2.81
	P3-O2	1.5685(63)		P3-O2	1.5693(63)		P3-O2	1.5779(71)		P3-O2	1.5770(71)		P3-O2	1.5738(72)		P3-O2	1.5747(71)		P3-O2	1.5742(69)		P3-O2	1.5773(69)		P3-O2	1.5779(69)		P3-O2	1.5775(63)		P3-O2	1.5761(63)		P3-O2	1.5738(63)		P3-O2	1.5758(63)		P3-O2	1.5742(72)		P3-O2	1.5746(72)		P3-O2	1.5758(69)		P3-O2
	P3-O6	1.5615(78)		P3-O6	1.5631(78)		P3-O6	1.5688(79)		P3-O6	1.5673(79)		P3-O6	1.5681(79)		P3-O6	1.5693(79)		P3-O6	1.5679(80)		P3-O6	1.5687(80)		P3-O6	1.5687(80)		P3-O6	1.5692(78)		P3-O6	1.5655(79)		P3-O6	1.5640(79)		P3-O6	1.5655(79)		P3-O6	1.5690(91)		P3-O6	1.5682(91)		P3-O6	1.5673(81)		P3-O6
	P3-O7	1.5517(76)		P3-O7	1.5531(76)		P3-O7	1.5529(78)		P3-O7	1.5512(78)		P3-O7	1.5558(78)		P3-O7	1.5523(78)		P3-O7	1.5553(78)		P3-O7	1.5549(78)		P3-O7	1.5565(78)		P3-O7	1.5591(77)		P3-O7	1.5644(76)		P3-O7	1.5680(76)		P3-O7	1.5699(76)		P3-O7	1.5681(79)		P3-O7	1.5744(79)		P3-O7	1.5644(77)		P3-O7
	P3-O9	1.5485(64)		P3-O9	1.5493(64)		P3-O9	1.5459(72)		P3-O9	1.5462(72)		P3-O9	1.5508(72)		P3-O9	1.5485(73)		P3-O9	1.5485(73)		P3-O9	1.5483(74)		P3-O9	1.5486(74)		P3-O9	1.5524(64)		P3-O9	1.5558(64)		P3-O9	1.5600(64)		P3-O9	1.5630(64)		P3-O9	1.5598(74)		P3-O9	1.5647(74)		P3-O9	1.5602(74)		P3-O9
Cood. Number		4			4			4			4			4			4			4			4			4			4			4			4			4			4			4			4
Average Bond Lengths		1.5575(35)			1.5587(35)			1.5614(38)			1.5604(38)			1.5621(38)			1.5612(38)			1.5615(38)			1.5623(38)			1.5629(38)			1.5645(35)			1.5655(35)			1.5665(36)			1.5685(36)			1.5678(40)			1.5705(40)			1.5669(38)
distt × 104		0.259			0.258			0.656			0.627			0.349			0.501			0.42			0.53			0.515			0.376			0.212			0.107			0.095			0.109			0.073			0.134
[truncated: 15 more columns]
